# Supplementary material
Source: Springer Nature journal article supplement (https://www.springermedizin.de/resource/supplementary/12877_2013_1022_MOESM1_ESM.pdf/9440940)
Supplement: MOESM1 [file 9440940]

**Identification**

**Screening**

**Eligibility**

**Included**

Records identified through  
database searching  
Medline 7399  
Embase 12,191  
PsycInfo 885  
Cinahl 1766  
(n = 22,241)

Additional records identified  
through other sources  
(n = 4)

Records after duplicates removed  
(n = 18,496)

Records screened  
(n = 18,496)

Records excluded  
(n = 18,089)

Full-text articles assessed  
for eligibility  
(n = 407)

Full-text articles excluded  
with reasons (see Table 1)  
(n = 323)

Studies included in  
qualitative synthesis  
(n=84)
